# Supplementary material for: New micro/mesoporous nanocomposite material from low-cost sources for the efficient removal of aromatic and pathogenic pollutants from water
Source: publisher site journal article supplement (doi:10.3762/bjnano.10.11), 2019-01-09
Supplement: Additional file 1 [file 2190-4286-10-11-S1.pdf]

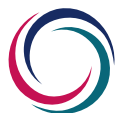

## Supporting Information

for

### **New micro/mesoporous nanocomposite material from low-cost sources for the efficient removal of aromatic and pathogenic pollutants from water**

Emmanuel I. Unuabonah, Robert Nöske, Jens Weber, Christina Günter and Andreas Taubert

*Beilstein J. Nanotechnol.* **2019**, *10*, 119–131. [doi:10.3762/bjnano.10.11](https://doi.org/10.3762/bjnano.10.11)

## Additional experimental results

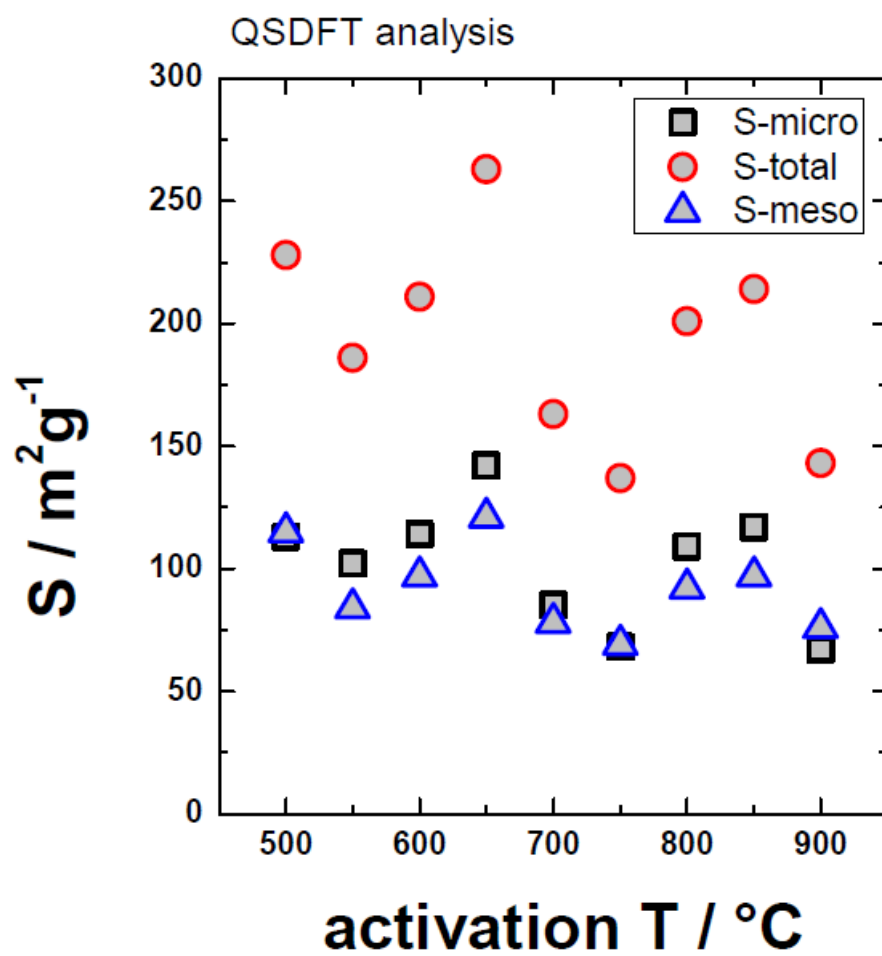

Figure S1: Specific BET surface area of various porosities in 2Z-HYCA materials vs temperature.

**Table S1: Data from Elemental, BET and EDX Analyses.**

|                       | % Element |     |     | BET (m <sup>2</sup> /g) | Pore Volume (cm <sup>3</sup> /g) |                   |                         | Micro/Mesopore Area |                   |                                      |
|-----------------------|-----------|-----|-----|-------------------------|----------------------------------|-------------------|-------------------------|---------------------|-------------------|--------------------------------------|
|                       | C         | H   | N   |                         | V <sub>mic</sub>                 | V <sub>meso</sub> | V <sub>mic + meso</sub> | SA <sub>mic</sub>   | SA <sub>mes</sub> | SA <sub>mes</sub> /SA <sub>mic</sub> |
| 2ZHYCA <sub>450</sub> | 18.4      | 2.0 | -   | 2.0                     | -                                | -                 | 0.021                   | -                   | -                 | 2.0                                  |
| 2ZHYCA <sub>500</sub> | 33.5      | 1.4 | 2.3 | 228                     | 0.055                            | 0.191             | 0.246                   | 113                 | 115               | 1.02                                 |
| 2ZHYCA <sub>550</sub> | 19.7      | -   | -   | 186                     | 0.048                            | 0.151             | 0.199                   | 102                 | 84                | 0.82                                 |
| 2ZHYCA <sub>600</sub> | 19.4      | -   | -   | 211                     | 0.052                            | 0.170             | 0.222                   | 114                 | 97                | 0.85                                 |
| 2ZHYCA <sub>650</sub> | 24.8      | -   | 1.6 | 263                     | 0.065                            | 0.213             | 0.278                   | 142                 | 121               | 0.85                                 |
| 2ZHYCA <sub>700</sub> | 28.8      | -   | 4.1 | 163                     | 0.039                            | 0.148             | 0.187                   | 85                  | 78                | 0.92                                 |
| 2ZHYCA <sub>750</sub> | 16.0      | -   | -   | 137                     | 0.031                            | 0.120             | 0.151                   | 68                  | 69                | 1.01                                 |
| 2ZHYCA <sub>800</sub> | 19.5      | -   | 1.7 | 201                     | 0.049                            | 0.158             | 0.207                   | 109                 | 92                | 0.84                                 |
| 2ZHYCA <sub>850</sub> | 24.4      | -   | 1.7 | 214                     | 0.053                            | 0.176             | 0.229                   | 117                 | 97                | 0.83                                 |
| 2ZHYCA <sub>900</sub> | 17.1      | -   | 1.3 | 143                     | 0.031                            | 0.144             | 0.175                   | 67                  | 76                | 1.13                                 |
